# Supplementary material
Source: Springer Nature journal article supplement (https://www.springermedizin.de/resource/supplementary/12916_2011_462_MOESM2_ESM.pdf/9599736)
Supplement: MOESM2 [file 9599736]

**Patients with physical complaint**  
N=724

« No » to both screening questions

« Yes » to at least one of the screening questions

**Negative to the two-screening questions**  
n= 432

**Positive to the two-screening questions**  
n= 292

|                  | n   | %     |
|------------------|-----|-------|
| Major depression | 6   | 1.4%  |
| Minor depression | 10  | 2.3%  |
| No depression    | 416 | 96.3% |

|                  | n   | %     |
|------------------|-----|-------|
| Major depression | 63  | 21.6% |
| Minor depression | 47  | 16.1% |
| No depression    | 182 | 62.3% |

« No » to the help question

« Yes » to the help question

**Negative to the Help question**  
n= 174

**Negative to the three-screening questions**  
n= 606

**Positive to the three-screening questions**  
n= 118

|                  | n   | %     |
|------------------|-----|-------|
| Major depression | 28  | 4.6%  |
| Minor depression | 41  | 6.8%  |
| No depression    | 537 | 88.6% |

|                  | n  | %     |
|------------------|----|-------|
| Major depression | 41 | 34.7% |
| Minor depression | 16 | 13.6% |
| No depression    | 61 | 51.7% |
